# Supplementary material for: Learning outcomes, learning support and cohort cohesion on a virtual field trip: an analysis of student and staff perceptions
Source: Copernicus journal article supplement (doi:10.5194/gc-2021-36), 2021-10-08
Supplement: Supplementary file 1 [file gc-2021-36-supplement.pdf]

# Supplementary Material – example questionnaire

## Pre-course Questionnaire - students

These first set of questions ask about your expectations of a virtual field trip.

1. What do you think the positive aspects of a virtual field course might be?
- 5 2. What do you think the negative aspects of a virtual field course might be?
3. Expected learning outcomes for this course, of which this field trip is a part are listed below.

Please rate each learning outcome on a scale of 1-5 of how likely you think it is to be achieved given the move to a virtual field trip; where - 1 is unlikely to be achieved and 5 is likely to be achieved.

- Seeing rocks in their context in the field
- 10 • Making detailed observations of rock outcrops and fabrics
- Collecting structural data
- Completing sedimentary logging
- Interpreting and analysing structural data
- Interpreting and analysing sedimentary logs
- 15 • Building and maintain a field notebook
- Field sketching
- Interpretation of field observations to make predictions
- Interpretation of field observations to build a geological history
- Synthesising datasets to create maps, cross sections, evolutionary understanding and analysis of palaeoenvironments.
- 20 4. A virtual field trip may have other influences

Please rate the following statements from: 1 (no to little impact) to 5 (significant impact).

A virtual field trip will in comparison to an actual field trip

- decrease peer-peer learning
- decrease student cohesion

25 Please rate the following statements from: 1 (less support) to 5 (more support).

A virtual field trip will in comparison to an actual field trip

- provide me personally with less academic support
- provide the group with less academic support

5. This field trip would normally take place over 10 days in the NW Highlands of Scotland. We have decided to run the course over 5 weeks, with the equivalent of 2 days of activity each week. We have done this in an attempt to maximise the ability for individuals to take part effectively in the field trip given other commitments (including but not limited to: key working, caring, responsibilities, internet access issues etc.).

30

Please rate the following statements from: 1 (bad) to 5 (good):

Running the field trip over 5 weeks, rather than in a compressed 10 day field trip slot (online), will be:

35

- Good for me personally
- Good for the student group as a whole

Please rate the following statements from 1 (not much) to 5 (yes a lot):

I think my ability to engage in and complete work on the Virtual Field Trip will be affected by:

- Caring responsibilities
- Lack of a quiet place to work and think
- Access to internet issues

40

- Having to work (non-academic)

6. We have sent out a printed workbook.

Please rate the following statements from 1 (not really) to 5 (yes alot):

45 A printed workbook will help me learn because:

- It will allow me to find a quieter space/place to learn.
- Will allow me to read instructions whilst working on the computer.
- Will allow me to reflect and read things away from the computer screen.
- Will be useful as a future reference resource.

50 7. Please add any other thoughts or feeling you have about completing a Virtual Field Trip at this stage.
